# Supplementary material for: A new species of Ampharete Malmgren, 1866 (Annelida: Ampharetidae) from Washington and redescription of A. cirrata Webster & Benedict, 1887 and A. labrops Hartman, 1961
Source: PeerJ. 2025 Nov 28;13:e20457. doi: 10.7717/peerj.20457 (PMC12667694; doi:10.7717/peerj.20457)
Supplement: Supplemental Information 3 [file peerj-13-20457-s003.xlsx]

## Sheet: K2P
Supplementary Table 3. K2P-corrected genetic distance matrix between COI sequences of Ampharete, Sabellides, and Anobothrus gracilis.
		1	2	3	4	5	6	7	8	9	10	11	12	13	14	15	16	17	18	19	20	21	22	23	24	25	26	27	28	29	30	31	32	33	34	35	36	37
1	BBPS506-19 A. cirrata (UF 8068)
2	BBPS507-19 A. cirrata (UF 8069)	0.00152207
3	BBPS508-19 A. cirrata (UF 8071)	0.00304879	0.00458018
4	BBPS509-19 A. cirrata (UF 8081)	0.00304879	0.00458018	0.00304879
5	BBPS1016-19 A. paulayi n. sp. (UF 7637)	0.160585	0.158605	0.158605	0.160585
6	BBPS1017-19 A. paulayi n. sp. (UF 7692)	0.160585	0.158605	0.158605	0.160585	0
7	BBPS043-19 A. paulayi n. sp. (UF 7977)	0.160585	0.158605	0.158605	0.160585	0	0
8	BBPS810-19 A. labrops (UF 8202)	0.181024	0.178966	0.178966	0.178966	0.161673	0.161673	0.161673
9	MG230531 A. santillani	0.206819	0.209012	0.202462	0.202462	0.193756	0.193756	0.193756	0.209052
10	MG230532 A. santillani	0.209139	0.211322	0.2048	0.2048	0.19613	0.19613	0.19613	0.213506	0
11	OR891670 A. santillani	0.195755	0.19792	0.191454	0.1936	0.193493	0.193493	0.193493	0.213175	0.00972478	0.00972478
12	OR891683 A. santillani	0.19792	0.200094	0.1936	0.195755	0.191352	0.191352	0.191352	0.210932	0.00809079	0.00809079	0.00160514
13	OR891675 A. undecima	0.185618	0.18341	0.18341	0.185618	0.195633	0.195633	0.195633	0.178441	0.176851	0.176521	0.178619	0.178619
14	OR891676 A. undecima	0.186322	0.184104	0.184104	0.186322	0.196377	0.196377	0.196377	0.17911	0.177516	0.177183	0.179297	0.179297	0
15	OR891678 A. undecima	0.187031	0.184803	0.184803	0.187031	0.197127	0.197127	0.197127	0.177713	0.17785	0.17785	0.179638	0.179638	0	0
16	OR891673 A. lindstroemi	0.225543	0.223244	0.227852	0.225543	0.221935	0.221935	0.221935	0.20845	0.150137	0.150137	0.155969	0.15389	0.188112	0.188841	0.189208
17	OR891681 A. lindstroemi	0.225543	0.223244	0.227852	0.225543	0.221935	0.221935	0.221935	0.20845	0.150137	0.150137	0.155969	0.15389	0.188112	0.188841	0.189208	0
18	OR891685 A. lindstroemi	0.229486	0.227312	0.23167	0.227312	0.217498	0.217498	0.217498	0.20065	0.150068	0.154659	0.15744	0.155386	0.190903	0.191625	0.19015	0	0
19	HM473290 A. labrops	0.178068	0.175927	0.175927	0.175927	0.157768	0.157768	0.157768	0.0131587	0.209602	0.214274	0.211587	0.211587	0.173544	0.173544	0.171763	0.21607	0.21607	0.205067
20	HM473291 A. labrops	0.180847	0.17881	0.17881	0.17881	0.161706	0.161706	0.161706	0.0173519	0.206336	0.210746	0.210375	0.208168	0.17414	0.174791	0.173384	0.203433	0.203433	0.196099	0.00818349
21	HM473292 A. labrops	0.180216	0.178187	0.178187	0.178187	0.161149	0.161149	0.161149	0.0125595	0.205573	0.20997	0.209589	0.207391	0.172003	0.172645	0.171233	0.204896	0.204896	0.19541	0	0.00772813
22	OR891672 A. finmarchica	0.201565	0.199396	0.201565	0.197236	0.194733	0.194733	0.194733	0.167593	0.191837	0.194222	0.200221	0.198042	0.178164	0.178832	0.179504	0.21276	0.21276	0.2167	0.172536	0.171663	0.164932
23	OR891684 A. finmarchica	0.20238	0.200257	0.198143	0.198143	0.193602	0.193602	0.193602	0.167112	0.191837	0.194222	0.200221	0.198042	0.176023	0.176681	0.177344	0.217327	0.217327	0.219316	0.169785	0.17109	0.162545	0.00312013
24	JX423738 A. finmarchica	0.20274	0.200613	0.198494	0.198494	0.196035	0.196035	0.196035	0.169133	0.196247	0.198614	0.204719	0.202526	0.176023	0.176681	0.177344	0.222007	0.222007	0.223868	0.169907	0.173106	0.166394	0.00625738	0.00458193
25	OR891674 A. falcata	0.205082	0.202815	0.202815	0.205082	0.182113	0.182113	0.182113	0.184627	0.214097	0.214097	0.213693	0.211466	0.164086	0.16471	0.165024	0.204929	0.204929	0.204929	0.184206	0.188773	0.18153	0.174001	0.174001	0.176345
26	OR891679 A. falcata	0.199546	0.19745	0.19745	0.19745	0.178312	0.178312	0.178312	0.182839	0.208095	0.21246	0.210026	0.207848	0.171588	0.172226	0.170801	0.207131	0.207131	0.205862	0.184548	0.186737	0.182001	0.175173	0.174526	0.174827	0.00162867
27	MG270098 A. falcata	0.203592	0.201483	0.201483	0.201483	0.182214	0.182214	0.182214	0.186853	0.205998	0.212407	0.212121	0.209938	0.171641	0.17228	0.170857	0.207131	0.207131	0.209912	0.188768	0.18661	0.185957	0.17915	0.178409	0.178717	0.004902	0.00610868
28	MG270099 A. falcata	0.199546	0.19745	0.19745	0.19745	0.178312	0.178312	0.178312	0.182839	0.201866	0.20827	0.207848	0.205678	0.169487	0.170116	0.168687	0.204929	0.204929	0.205862	0.184548	0.186737	0.182001	0.175173	0.174526	0.174827	0.00326265	0.00304879	0.00293848
29	OM470635 A. cirrata	0.0478071	0.0461376	0.0444737	0.0478071	0.152711	0.152711	0.152711	0.176917	0.204636	0.209139	0.195755	0.19792	0.190062	0.190786	0.191515	0.218678	0.218678	0.225148	0.178068	0.180847	0.180216	0.199396	0.198143	0.198494	0.200557	0.201652	0.201483	0.19745
30	OM470636 A. cirrata	0.0494821	0.0478071	0.0461376	0.0494821	0.154668	0.154668	0.154668	0.178966	0.204636	0.209139	0.195755	0.19792	0.190062	0.190786	0.191515	0.218678	0.218678	0.227312	0.180219	0.182892	0.182252	0.201565	0.200257	0.200613	0.200557	0.203766	0.203592	0.199546	0.00152207
31	MT166986 A. californica	0.210509	0.208408	0.210509	0.206316	0.197648	0.197648	0.197648	0.213444	0.169173	0.173831	0.174684	0.176763	0.161454	0.162051	0.160617	0.21604	0.21604	0.211999	0.207695	0.210775	0.210025	0.180663	0.185863	0.188113	0.190225	0.184032	0.180149	0.176697	0.206316	0.208408
32	CMBIA290-11 Sabellides manriquei	0.191831	0.19401	0.189662	0.191831	0.174841	0.174841	0.174841	0.19918	0.179287	0.179287	0.176793	0.174692	0.168597	0.169242	0.169565	0.203883	0.203883	0.203883	0.194768	0.19438	0.197929	0.200326	0.198133	0.198133	0.183045	0.185173	0.185173	0.183045	0.185351	0.185351	0.144187
33	JX423770 Sabellides octocirrata	0.193854	0.195878	0.18983	0.191838	0.170181	0.170181	0.170181	0.18959	0.175221	0.18171	0.176809	0.174743	0.163153	0.163756	0.162305	0.200106	0.200106	0.199271	0.185107	0.185288	0.19057	0.194905	0.193785	0.191838	0.175594	0.172382	0.172323	0.168483	0.183853	0.185838	0.151306	0.0318189
34	OR891671_Sabellides octocirrata	0.201562	0.203611	0.197488	0.199521	0.177605	0.177605	0.177605	0.195688	0.176956	0.183439	0.17856	0.176489	0.163153	0.163756	0.162305	0.201961	0.201961	0.198921	0.191449	0.191276	0.196594	0.198699	0.197488	0.193854	0.179412	0.177911	0.177846	0.173982	0.19144	0.193448	0.151051	0.0352612	0.00612565
35	OR891680 Sabellides octocirrata	0.204962	0.207224	0.200467	0.202709	0.184975	0.184975	0.184975	0.200753	0.179148	0.179148	0.180915	0.178751	0.164991	0.165637	0.165961	0.210981	0.210981	0.210981	0.193946	0.195818	0.199455	0.198393	0.19616	0.19431	0.185206	0.187395	0.187395	0.185206	0.196013	0.196013	0.159723	0.0345214	0.00336136	0.00167504
36	MG270106 Anobothrus gracilis	0.205421	0.207474	0.201339	0.203376	0.197565	0.197565	0.197565	0.193868	0.207832	0.214239	0.207938	0.205764	0.182156	0.18284	0.181435	0.224739	0.224739	0.236513	0.189484	0.189471	0.190761	0.197269	0.202045	0.200558	0.17379	0.18212	0.174955	0.174869	0.203376	0.205421	0.170374	0.146147	0.151275	0.152878	0.149401
37	JX423739 Anobothrus gracilis	0.205781	0.207839	0.201691	0.203732	0.199951	0.199951	0.199951	0.195926	0.210746	0.21729	0.206237	0.204063	0.184307	0.184999	0.183599	0.223007	0.223007	0.234889	0.191621	0.191492	0.192778	0.193537	0.198381	0.198492	0.18052	0.188484	0.184541	0.184443	0.205781	0.207839	0.174126	0.148147	0.153147	0.153147	0.149694	0.00458719
